# Supplementary material
Source: Elsevier journal article supplement (https://rcastoragev2.blob.core.windows.net/2ef5afefa62a9b9e495cf9b759f62528/mmc1.pdf)
Supplement: mmc1 [file mmc1.pdf]

**Current Biology, Volume 31**

## **Supplemental Information**

### **Plastin and spectrin cooperate to stabilize the actomyosin cortex during cytokinesis**

**Ana Filipa Sobral, Fung-Yi Chan, Michael J. Norman, Daniel S. Osório, Ana Beatriz Dias, Vanessa Ferreira, Daniel J. Barbosa, Dhanya Cheerambathur, Reto Gassmann, Julio Monti Belmonte, and Ana Xavier Carvalho**

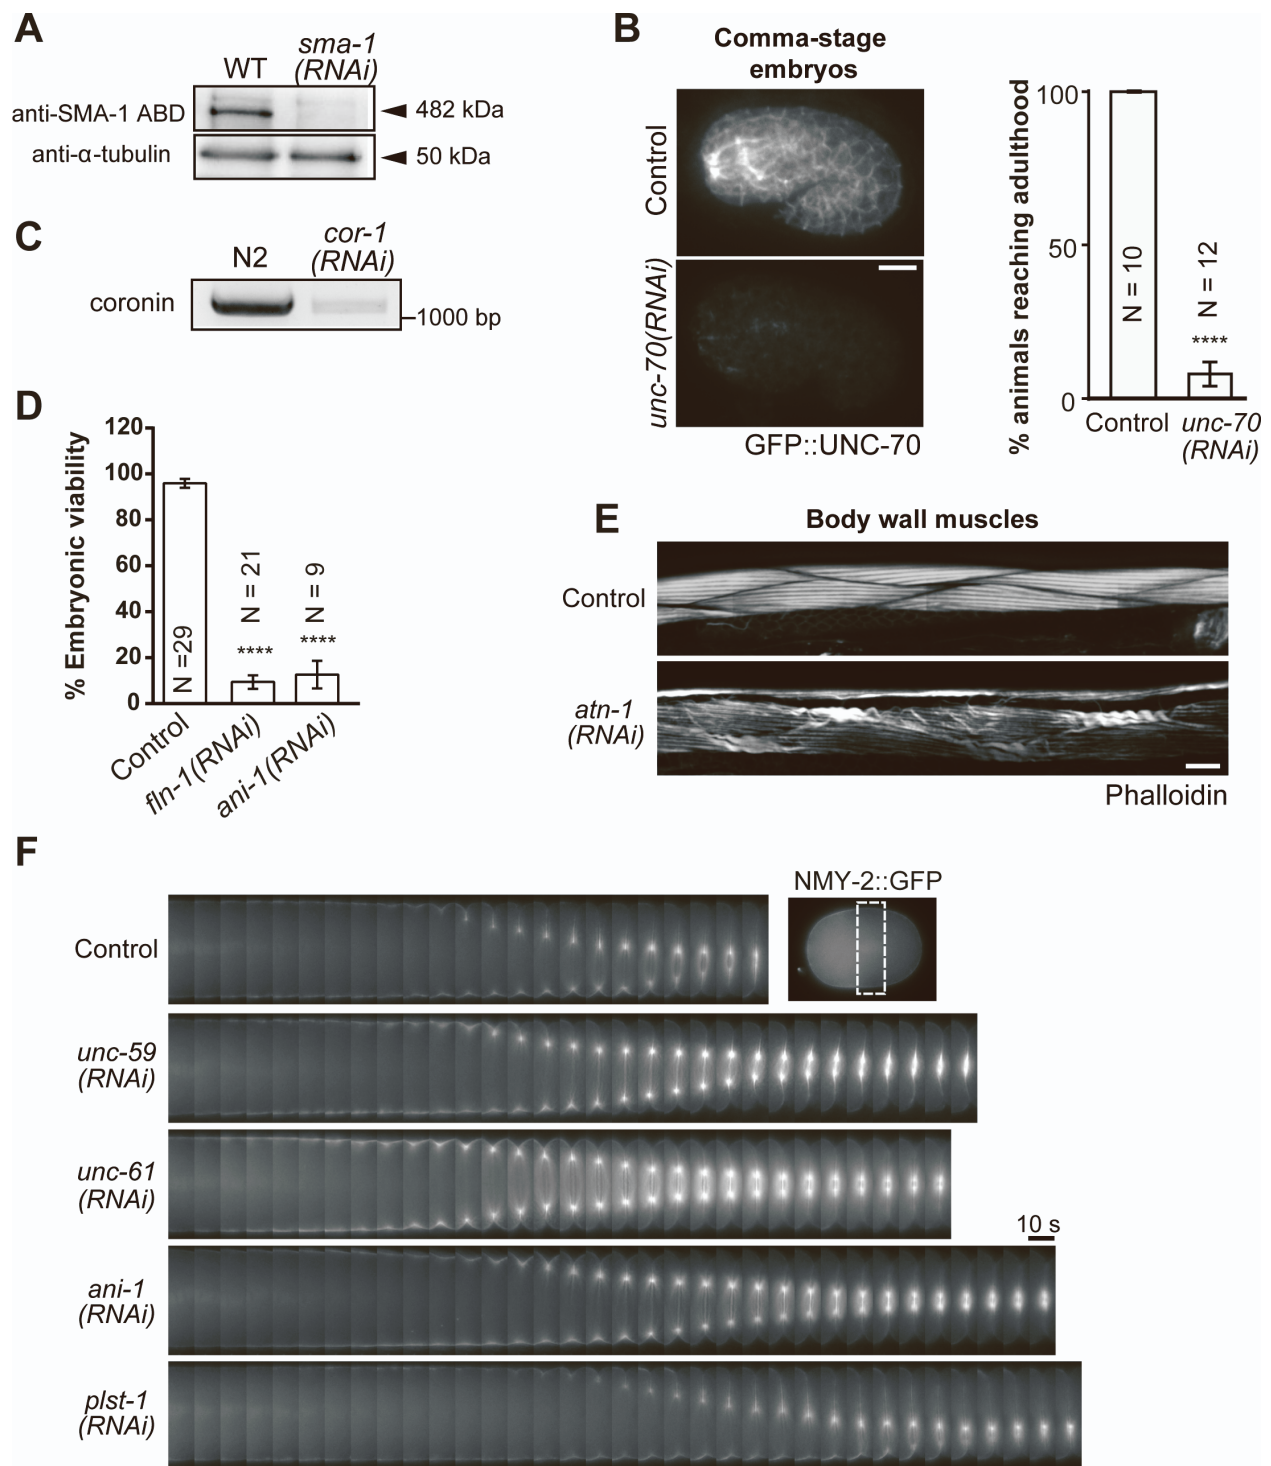

**Figure S1. Validation of RNAi efficiency. Related to Figure 1.**

(A) Immunoblot of adult *C. elegans* lysate with an antibody raised against the actin-binding domain (ABD) of SMA-1, showing efficient depletion of SMA-1 after *sma-1(RNAi)*. WT is wild-type.  $\alpha$ -tubulin serves as the loading control. (B) (left) Stills of comma-stage embryos expressing endogenous UNC-70::GFP before and after *unc-70(RNAi)*. Scale bar, 10  $\mu$ m. (right) Percentage (mean  $\pm$  95% CI) of *unc-70(RNAi)* animals that develop to adulthood. Most *unc-70(RNAi)* animals arrest at the L1 stage, consistent with a previous study <sup>[S1]</sup>. Statistical significance was determined using unpaired two-tailed Student t-test: \*\*\*\*p  $\leq$  0.0001. (C) RT-PCR for *cor-1* in N2 controls and after *cor-1(RNAi)* using primers Fw 5'-CGTCGACAAGGACTATCCA-3' and Rv 5'-GGAGCCAAAGTGCTCAA-3' that amplify the 3 isoforms. Method was described previously <sup>[S2]</sup>. (D) Percentage of embryonic viability (mean  $\pm$  95% CI) in N2 controls, after *fln-1(RNAi)*, and *ani-1(RNAi)*, consistent with previous studies <sup>[S3,S4]</sup>. Statistical significance was determined using one-way ANOVA followed by Dunnett's multiple comparison test: \*\*\*\*p  $\leq$  0.0001. (E) Images of body wall muscles stained with phalloidin. *atn-1(RNAi)* results in curled F-actin fibers, as expected from previous study <sup>[S5]</sup>. Method was described previously <sup>[S6]</sup>. Scale bar, 10  $\mu$ m. (F) Images of the equatorial region in dividing one-cell embryos expressing NMY-2::GFP. The first frame corresponds to anaphase onset. Symmetric furrow closure confirms efficient RNAi-mediated depletion of UNC-59, UNC-61 and ANI-1, as described previously <sup>[S7]</sup>. Prolonged cytokinesis confirms efficient RNAi-mediated depletion of PLST-1. Scale bar, 10  $\mu$ m.

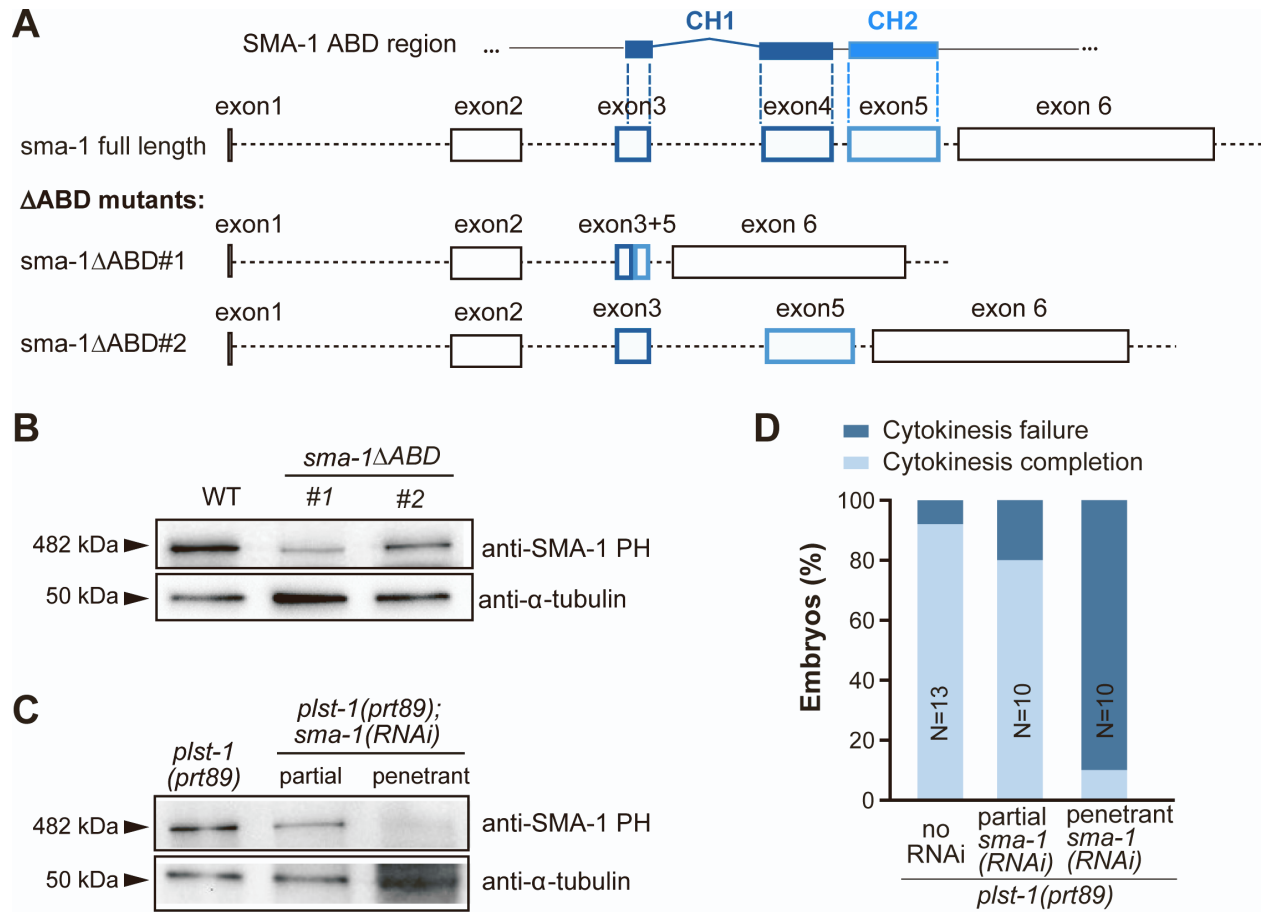



**Figure S2. SMA-1 deletion mutants that lack most of the actin binding domain are expressed at lower levels but this is unlikely to explain the cytokinesis failure in the *plst-1(prt89)* background. Related to Figure 4.**

**(A)** Schematic of the first 6 exons and 5 introns of the *sma-1* gene in wild-type and after editing to obtain ABD deletions ( $\Delta$ ABD). Part of exon 3 and exon 4 encode the first CH domain (CH1), and exon 5 encodes the second CH domain (CH2). SMA-1 $\Delta$ ABD#1 lacks most of exon 3, the entire exon 4, and most of exon 5. SMA-1 $\Delta$ ABD#2 lacks exon 4. **(B)** Immunoblot of adult *C. elegans* lysate with an affinity-purified anti-SMA-1 antibody raised against the PH domain, showing SMA-1 levels in animals expressing the two different SMA-1 $\Delta$ ABD versions.  $\alpha$ -tubulin serves as the loading control. **(C)** Anti-SMA-1 immunoblot of adult *C. elegans* lysate, showing protein levels in *plst-1(prt89)* animals after partial or penetrant *sma-1(RNAi)*.  $\alpha$ -tubulin serves as the loading control. **(D)** Percentage of cytokinesis completion/failure in one-cell *plst-1(prt89)* embryos after partial and penetrant depletion of SMA-1. N indicates the number of embryos analyzed.

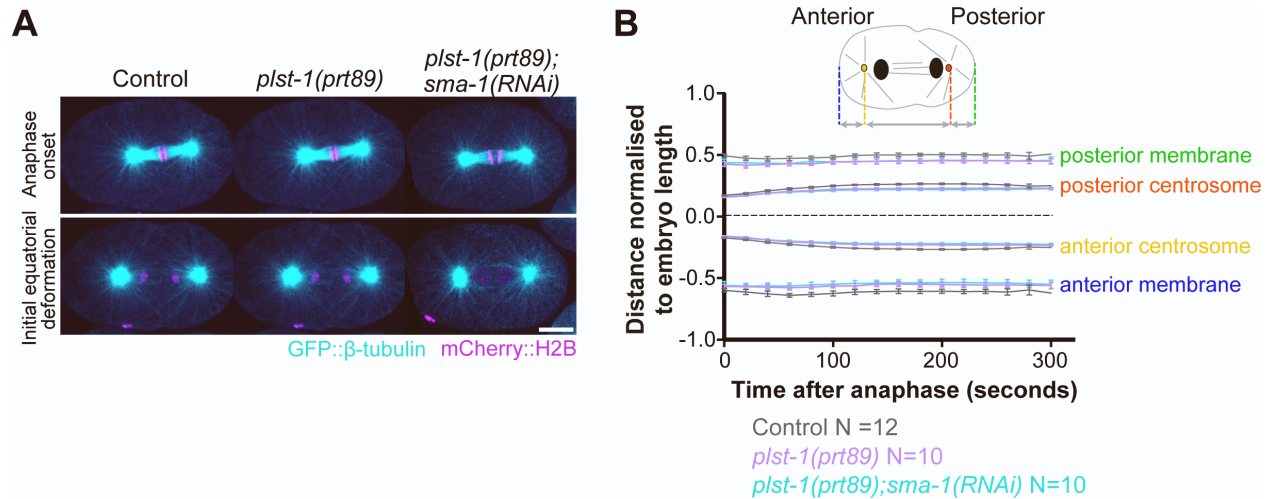

**Figure S3. Mitotic spindle morphology and positioning is normal in *plst-1(prt89)* and *plst-1(prt89);sma-1(RNAi)* embryos. Related to Figure 5.**

**(A)** Images of the central plane in one-cell embryos co-expressing GFP:: $\beta$ -tubulin and mCherry::histone H2B at anaphase onset and equatorial shallow deformation. Scale bar, 10  $\mu$ m. **(B)** Centrosome positioning (mean  $\pm$  95% CI) along the anterior-posterior axis of the embryo over time after anaphase onset. Dashed line indicates the midpoint between the two centrosomes. N indicates the number of embryos analyzed.

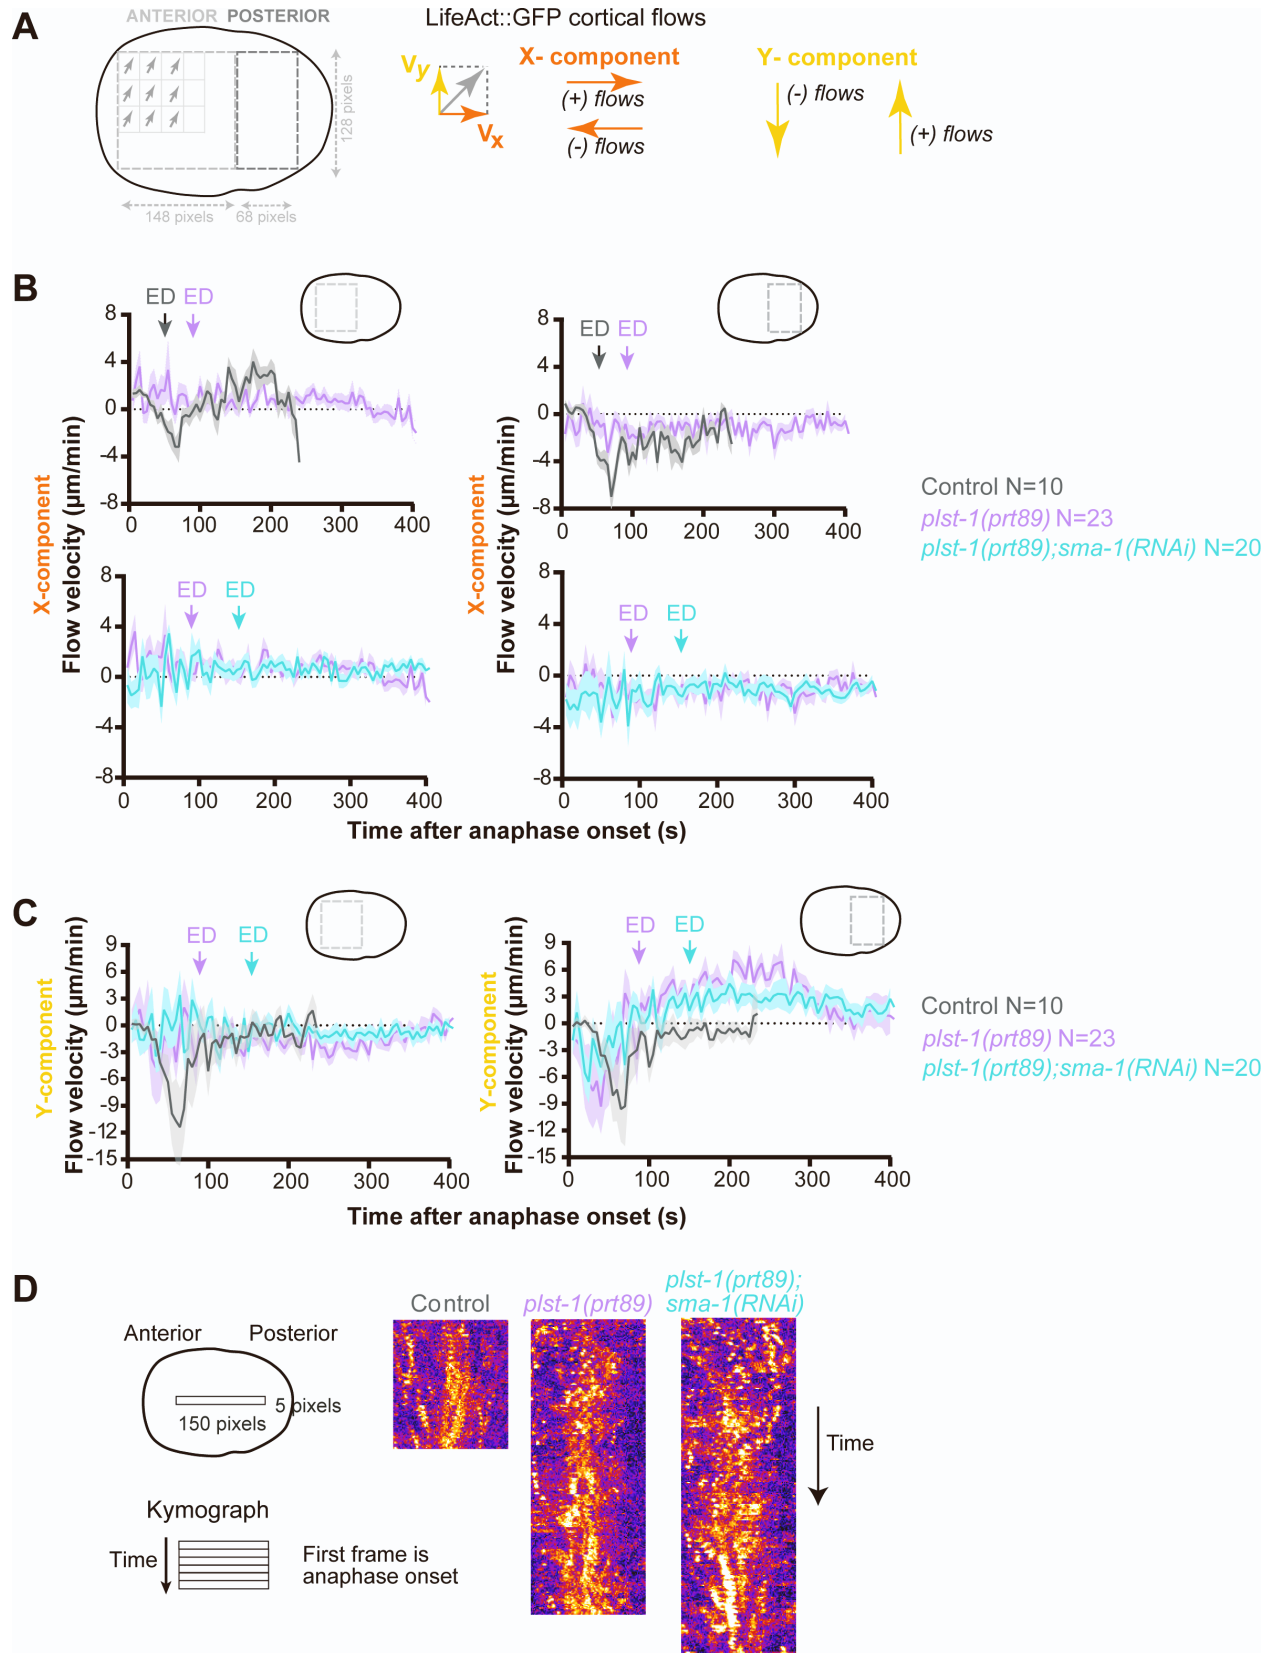

**Figure S4. Failure of cytokinesis in *plst-1(prt89);sma-1(RNAi)* embryos is not due to perturbed F-actin cortical flows. Related to Figure 5.**

(A) Schematic illustrating the analysis of cortical F-actin flows by particle image velocimetry. X- and Y-components of the velocity vectors in the anterior or posterior regions of the embryo were averaged for each time point after anaphase onset. For the X-component, negative velocity values indicate posterior-anterior oriented flows and positive velocity values indicate anterior-posterior oriented flows. (B,C) X-component (B) or Y-component (C) flow velocities (mean  $\pm$  SEM) at anterior (*left*) and posterior (*right*) cortex over time after anaphase onset in embryos expressing LifeAct::GFP. ED, initial equatorial deformation. Posterior-anterior directed flows in control embryos were particularly prominent on the posterior side, initiated before equatorial deformation, and peaked shortly thereafter (panel B, top right). F-actin cortical flows in *plst-1(prt89)* and *plst-1(prt89);sma-1(RNAi)* embryos were erratic and decreased in velocity (panel B, bottom right). N indicates the number of embryos analyzed. (D) Kymographs of the region indicated in the schematic on the left showing LifeAct::GFP cortical flows along the longitudinal axis in one-cell embryos, starting at anaphase onset.

**A**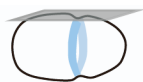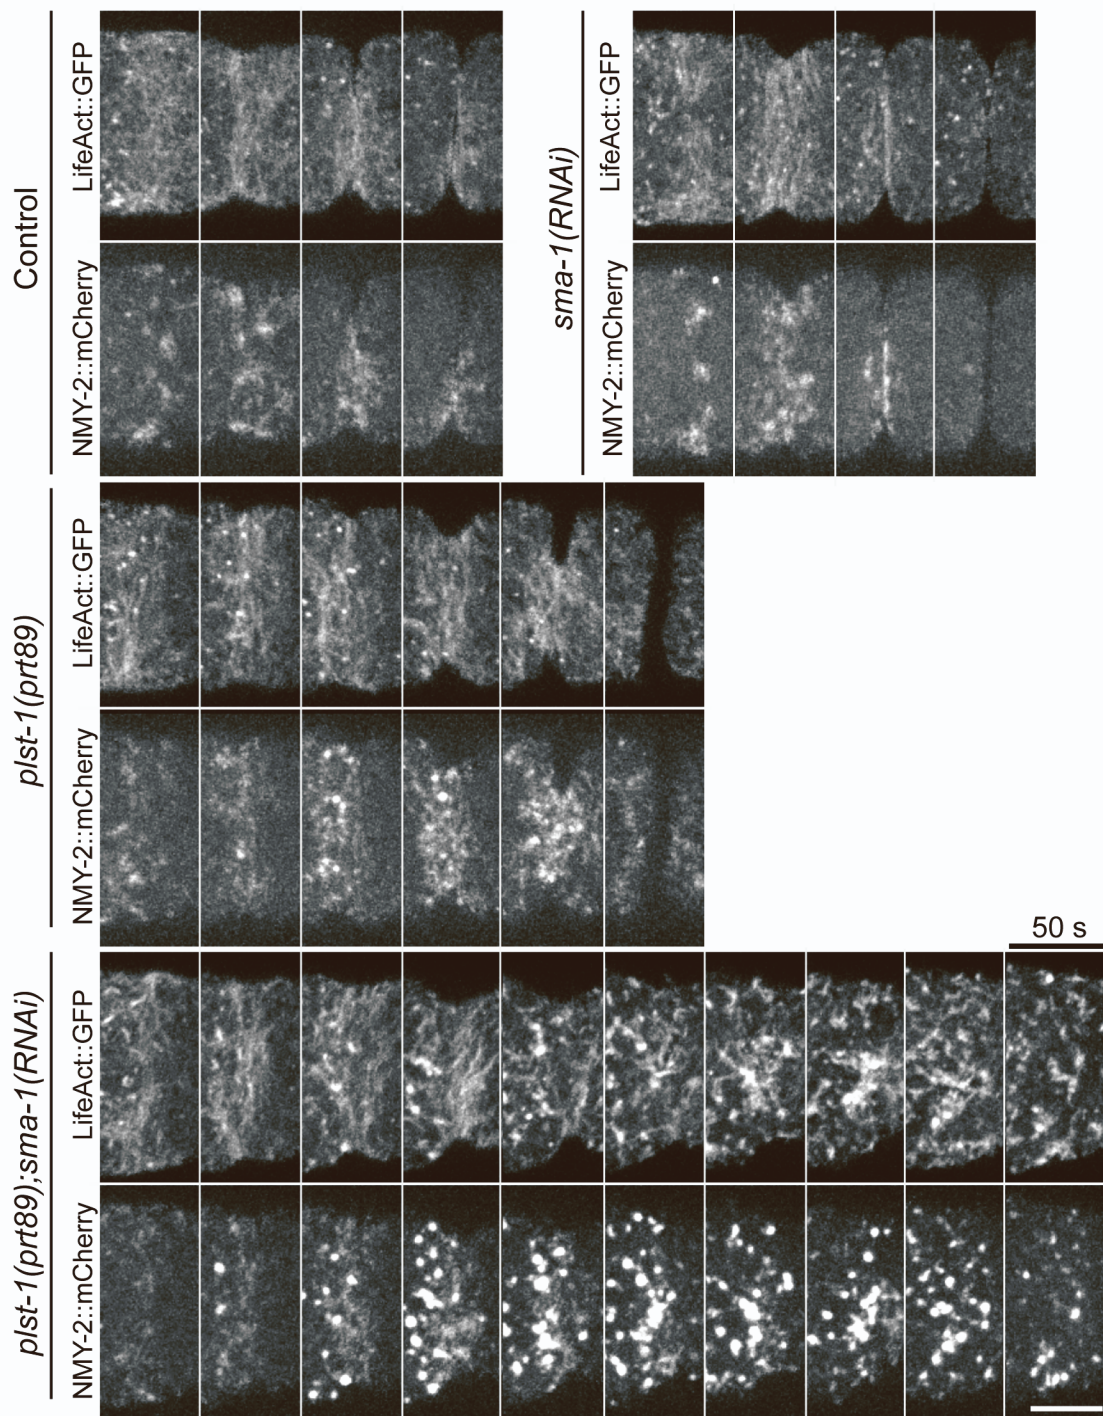

**Figure S5. Myosin coalescence into bright puncta in *plst-1(prt89);sma-1(RNAi)* embryos coincides with F-actin cluster formation. Related to Figures 5 and 6.**

**(A)** Images of the equatorial cortical region in one-cell embryos co-expressing NMY-2::mCherry and LifeAct::GFP. First frame corresponds to the initial enrichment of NMY-2::mCherry at the cell equator. Scale bar, 10  $\mu$ m.



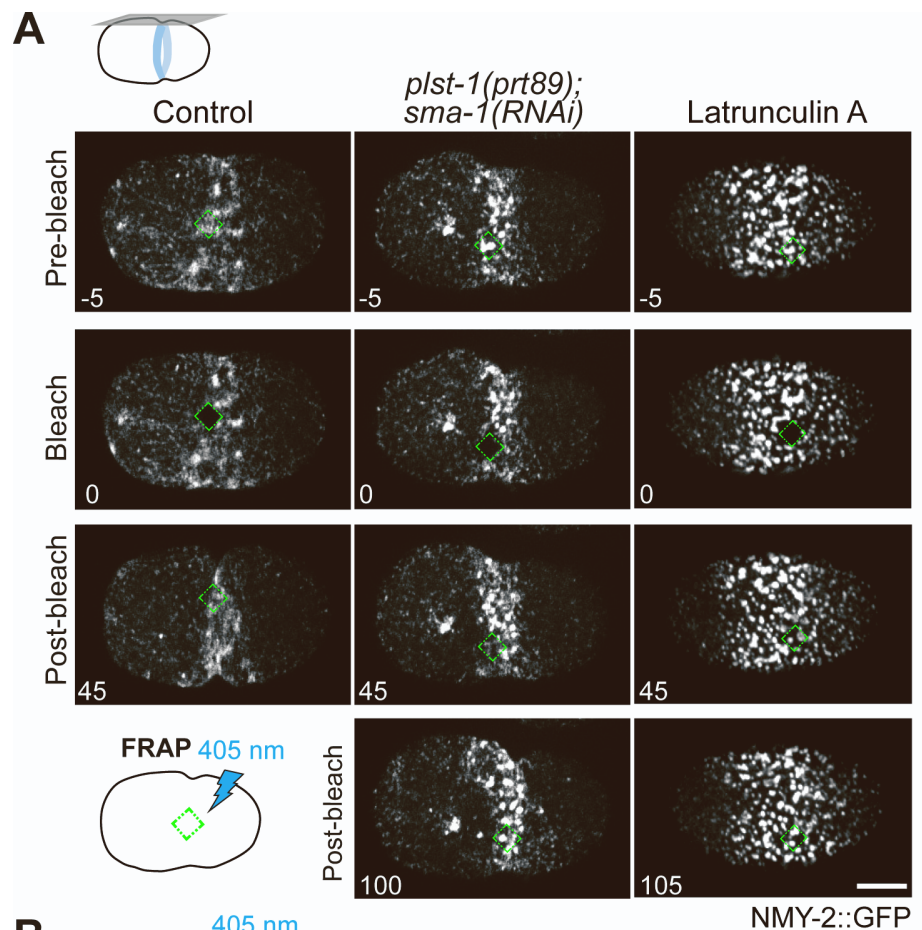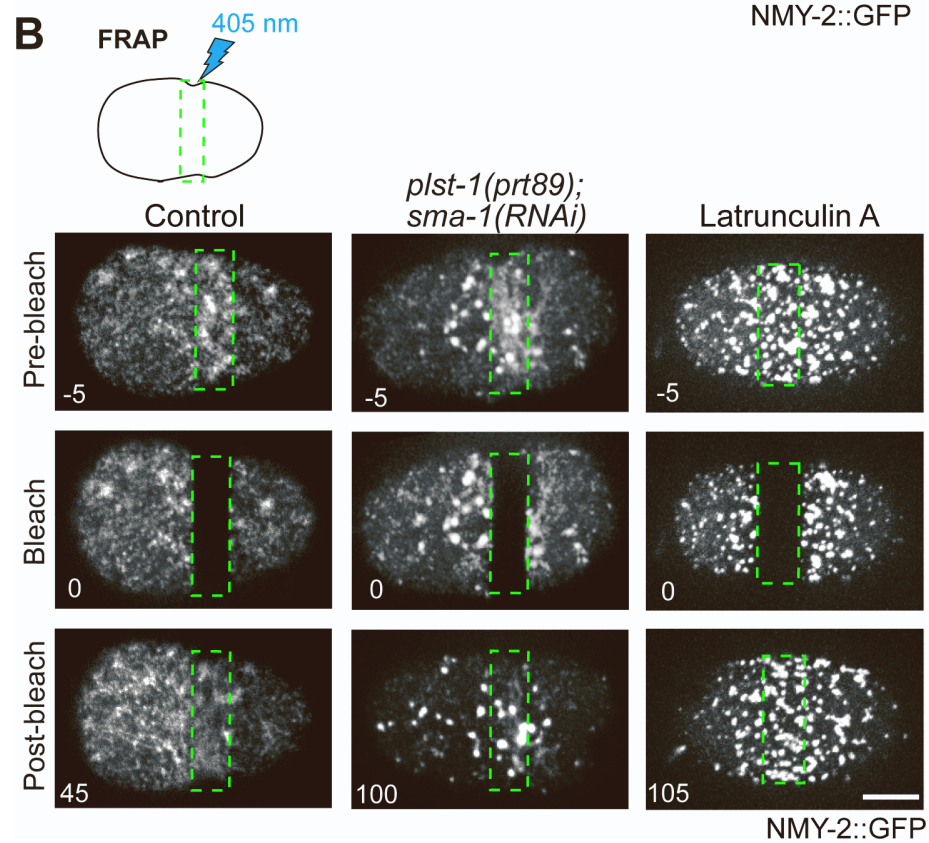

**Figure S6. Fluorescence recovery after photobleaching of NMY-2::GFP at the cell equator. Related to Figure 6.**

**(A,B)** Images of the cortex in *plst-1(prt89);sma-1(RNAi)* and Latrunculin A-treated one-cell embryos expressing NMY-2::GFP just before and after photobleaching of a portion (*A*) or the entire (*B*) cell equator at initial equatorial deformation, when myosin puncta start accumulating at the cell equator in *plst-1(prt89);sma-1(RNAi)* embryos. Numbers indicate the time in seconds relative to the photobleaching event. Schematics show the photobleached regions. Scale bars, 10  $\mu\text{m}$ .



**A**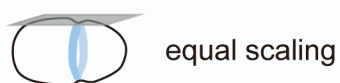

SMA-1::spGFP

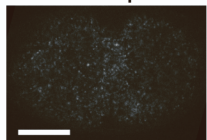

SPC-1::GFP

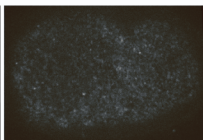

PLST-1::GFP

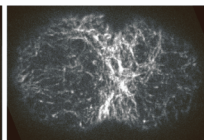**B**

unformed ring

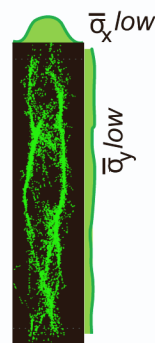

$$M = \bar{\alpha}_x (1 - \bar{\alpha}_y) \sim 0$$

formed ring

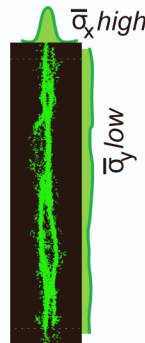

$$M \sim 1$$

broken ring

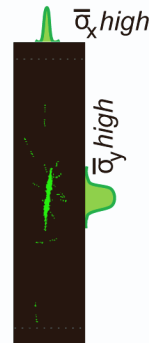

$$M \sim 0$$

**C**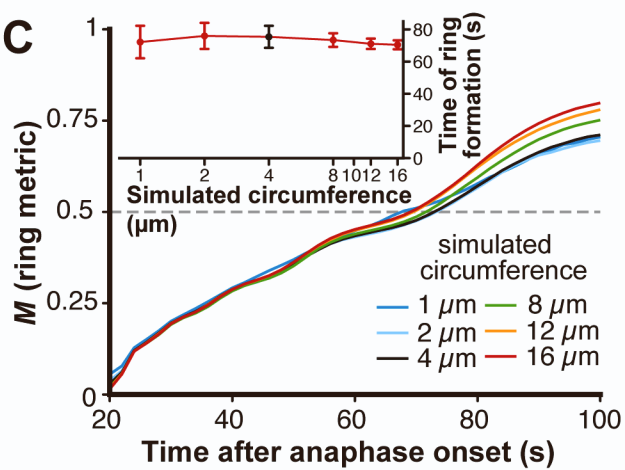**D**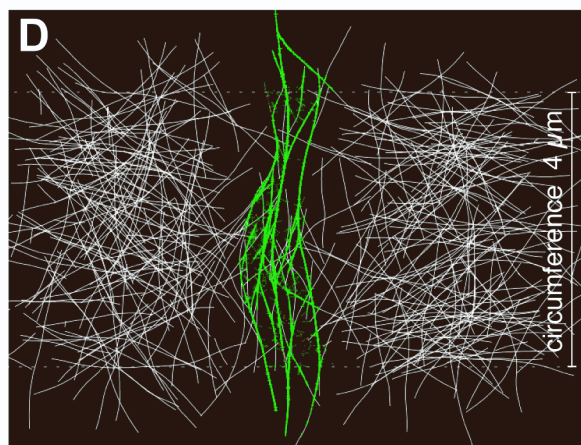**E**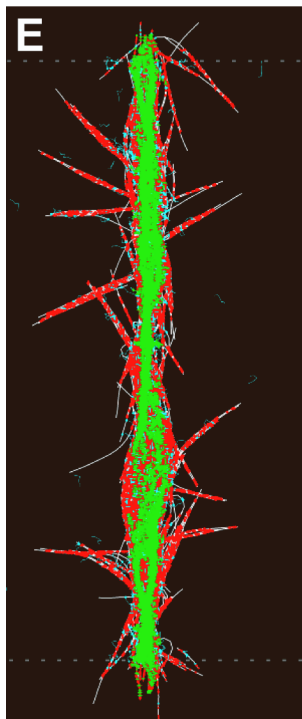**F**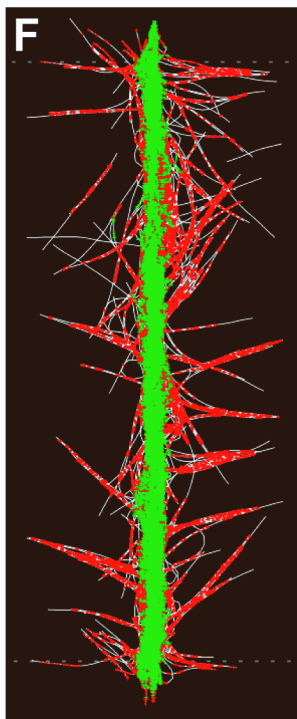**G**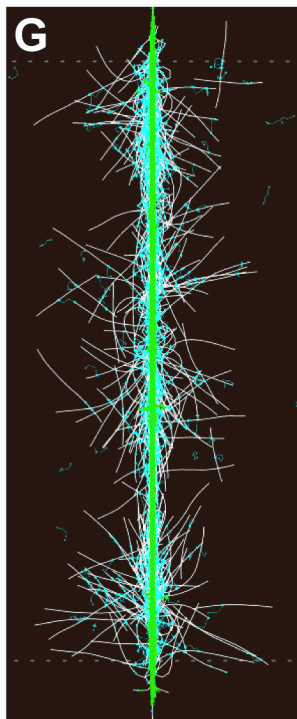**H**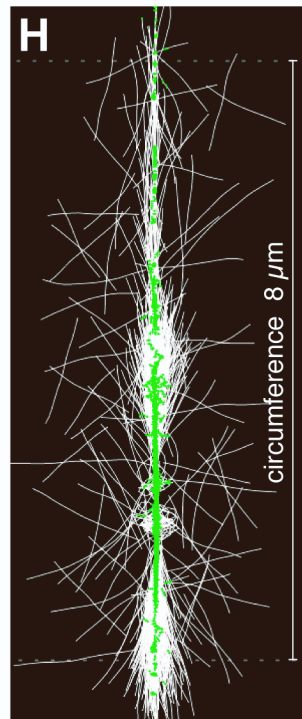

**Figure S7. Relative expression levels of GFP-tagged SMA-1 and PLST-1 in the early embryo, simulation metric calculation, and scaling and effects of no end-dwelling on depolymerizing ends. Related to Figures 3 and 7.**

(A) Equally scaled images of the cortex in one-cell embryos expressing SMA-1::spGFP, SPC-1::GFP or PLST-1::GFP. Scale bar, 10  $\mu\text{m}$ . (B) Simulation snapshots showing only myosin motors for simulations that (from left to right): fail to form a compact ring (double amount of plastin); successfully form a ring (reference simulation, same as last panel in Figure 7B); experience ring rupture (scenario with no plastins). Next to all snapshots are sketch plots that illustrate the measurements of  $x$  and  $y$  that are used for the ring metric (eq. 1). (C) Use of longer or shorter lengths of simulated circumference does not affect simulation results. Main plot: ring metric evolution for different circumference lengths. Inset: timing of ring formation or different circumference lengths  $\pm$  SD. (D) Allowing motors to immediately fall off from depolymerizing barbed ends, instead of end-dwelling, leads to the gradual removal of F-actin from the ring midline and the ring forms with only a few F-actin fibers. (E-H) Simulation snapshots at 100 s after anaphase for scenarios with (E) all elements, (F) no spectrin, (G) no plastin, and (H) no plastin and no spectrin. Color legend: white - actin fibers, green - myosin, red - plastin, and cyan -  $\beta\text{H}/\alpha$ -spectrin tetramer.

| <b>Fluorescent probe</b><br>(expressed from transgene or endogenous locus; found in which strains) | <b>Method used for strain generation</b> | <b>Test of functionality</b>                                                                                                                                                                         | <b>Reference</b> |
|----------------------------------------------------------------------------------------------------|------------------------------------------|------------------------------------------------------------------------------------------------------------------------------------------------------------------------------------------------------|------------------|
| LifeAct::GFP<br>(transgene; GCP22, GCP927, GCP1163, GCP1164, GCP1169, GCP1170, GCP1176, GCP1187)   | Bombardment                              | Normal cytokinesis timing in 1-cell embryo.<br>Normal strain growth.                                                                                                                                 | [S8]             |
| LifeAct::RFP<br>(transgene; GCP1207)                                                               | Bombardment                              | Normal cytokinesis timing in 1-cell embryo.<br>Normal strain growth.                                                                                                                                 | [S9]             |
| PLST-1::GFP<br>(endogenous locus; GCP831, GCP832, RZB217)                                          | CRISPR/Cas9 <sup>a</sup>                 | Normal cytokinesis timing in 1-cell embryo.<br>Normal strain growth.                                                                                                                                 | [S8]             |
| NMY-2::GFP<br>(endogenous locus; GCP113 and GCP570)                                                | CRISPR/Cas9 <sup>a</sup>                 | Normal cytokinesis timing in 1-cell embryo.<br>Normal strain growth.                                                                                                                                 | [S8]             |
| NMY-2::mCherry<br>(transgene; GCP22, GCP927, GCP1163, GCP1164, GCP1169, GCP1170, GCP1176, GCP1187) | MosSci <sup>b</sup> ,<br>Chromosome II   | NMY-2::mCherry is able to replace endogenous nmy-2.<br>Normal strain growth.                                                                                                                         | [S10]            |
| GFP::ANI-1<br>(transgene; OD130)                                                                   | Bombardment                              | Normal strain growth.<br>Pattern of localization of GFP::ANI-1 identical to that observed in strain MDX29, where the endogenous locus of ani-1 is tagged with mNeonGreen (Rehain-Bell et al., 2017). | [S11]            |
| UNC-59::GFP<br>(transgene; OD121)                                                                  | Bombardment                              | UNC-59::GFP expression under the control of the pie-1 regulatory sequences                                                                                                                           | [S12]            |

|                                                                       |                          |                                                                                      |            |
|-----------------------------------------------------------------------|--------------------------|--------------------------------------------------------------------------------------|------------|
|                                                                       |                          | rescues the localization of UNC-61 (the other septin with which UNC-59 oligomerizes) |            |
| SMA-1::splitGFP<br>(endogenous locus;<br>GCP991, GCP1207,<br>GCP1208) | CRISPR/Cas9 <sup>a</sup> | Normal strain growth.                                                                | This study |
| SPC-1::GFP<br>(endogenous locus;<br>GOU2936)                          | CRISPR/Cas9 <sup>a</sup> | Normal strain growth.                                                                | [S13]      |

<sup>a</sup> CRISPR/Cas9 - Clustered Regularly Interspaced Short Palindromic Repeats/CRISPR-associated protein 9

<sup>b</sup> MosSci - Mos1-mediated Single Copy Insertion

**Table S1. Summary of fluorescent tagged proteins used in this study. Related to Figures 1-7.**

| Oligonucleotide purpose                                  | Oligonucleotide sequence (5'-3')                                                             |
|----------------------------------------------------------|----------------------------------------------------------------------------------------------|
| For production of dsRNA against ani-1 (Y49E10.19)_Fwd    | taatacgactcactataggTCAAACCTCAATGGAGAGGACAA-3'<br><i>T7 promoter sequence is in lowercase</i> |
| For production of dsRNA against ani-1 (Y49E10.19)_Rev    | aattaaccctcactaaaggCATTGTGCTTCAAATTCCTCAC<br><i>T3 promoter sequence is in lowercase</i>     |
| For production of dsRNA against atn-1 (W04D2.1)_Fwd      | aattaaccctcactaaaggCAAAGCTCGAGGACTACCG<br><i>T3 promoter sequence is in lowercase</i>        |
| For production of dsRNA against atn-1 (W04D2.1)_Rev      | taatacgactcactataggAGCTGCGAATCTCTTCTTGG<br><i>T7 promoter sequence is in lowercase</i>       |
| For production of dsRNA against fln-1 #1 (Y66H1B.2)_Fwd  | aattaaccctcactaaaggCCGATTTCCAACCTTCACTTCC<br><i>T3 promoter sequence is in lowercase</i>     |
| For production of dsRNA against fln-1 #1 (Y66H1B.2)_Rev  | taatacgactcactataggGACTTCACCAGCAACCTTAAC<br><i>T7 promoter sequence is in lowercase</i>      |
| For production of dsRNA against fln-1 #2 (Y66H1B.2)_Fwd  | aattaaccctcactaaaggTGGATGGGCAACTGTTTATG<br><i>T3 promoter sequence is in lowercase</i>       |
| For production of dsRNA against fln-1 #2 (Y66H1B.2)_Rev  | taatacgactcactataggGAGCTCCTCCTTCAGAGAAT<br><i>T7 promoter sequence is in lowercase</i>       |
| For production of dsRNA against plst-1 (Y104H12BR.1)_Fwd | aattaaccctcactaaaggACTCGGAGTCCATGGAAATG<br><i>T3 promoter sequence is in lowercase</i>       |
| For production of dsRNA against plst-1 (Y104H12BR.1)_Rev | taatacgactcactataggCACCATTTTTGGCTTCACCT<br><i>T7 promoter sequence is in lowercase</i>       |
| For production of dsRNA against unc-59 (W09C5.2)_Fwd     | taatacgactcactataggCGTGAACTCGTGGAGAACA<br><i>T7 promoter sequence is in lowercase</i>        |
| For production of dsRNA against unc-59 (W09C5.2)_Rev     | aattaaccctcactaaaggTTGTGGTGGAGTTCAACGTG<br><i>T3 promoter sequence is in lowercase</i>       |
| For production of dsRNA against unc-61 (Y50E8A.4)_Fwd    | taatacgactcactataggAGCTGTCTGAAGCTGGATTTC<br><i>T7 promoter sequence is in lowercase</i>      |
| For production of dsRNA against unc-61 (Y50E8A.4)_Rev    | aattaaccctcactaaaggACGGCTGAACTCGTCTTGAT<br><i>T3 promoter sequence is in lowercase</i>       |
| For production of dsRNA against unc-70 (K11C4.3)_Fwd     | aattaaccctcactaaaggCACTGTCTTGAGAACGTTGAG<br><i>T3 promoter sequence is in lowercase</i>      |

|                                                                 |                                                                                                                                                                                                                                                                                                                                                                                                          |
|-----------------------------------------------------------------|----------------------------------------------------------------------------------------------------------------------------------------------------------------------------------------------------------------------------------------------------------------------------------------------------------------------------------------------------------------------------------------------------------|
| For production of dsRNA against unc-70 (K11C4.3)_Rev            | taatacgaactcactataggAATGGATTTCTCATCAGGTTGG<br><i>T7 promoter sequence is in lowercase</i>                                                                                                                                                                                                                                                                                                                |
| For production of dsRNA against erm-1 (C01G8.5)_Fwd             | aattaaccctcactaaaggCTTCTACGCTCCACGACTCC<br><i>T3 promoter sequence is in lowercase</i>                                                                                                                                                                                                                                                                                                                   |
| For production of dsRNA against erm-1 (C01G8.5)_Rev             | taatacgaactcactataggCTCCATATGCAGAACGTCGTA<br><i>T7 promoter sequence is in lowercase</i>                                                                                                                                                                                                                                                                                                                 |
| Single guide RNA #1 used to generate <i>sma-1</i> ΔABD#1 mutant | TCACGCATTCGGACACTGC                                                                                                                                                                                                                                                                                                                                                                                      |
| Single guide RNA #2 used to generate <i>sma-1</i> ΔABD#1 mutant | GTGCAACTCCTTTCTTAAT                                                                                                                                                                                                                                                                                                                                                                                      |
| Single guide RNA #3 used to generate <i>sma-1</i> ΔABD#1 mutant | ATTGACTTCTCGTCAGGCC                                                                                                                                                                                                                                                                                                                                                                                      |
| Repair template used to generate <i>sma-1</i> ΔABD#1 mutant     | cagGTTTCGTGTTCCAACAAGTGGTGCACCACCAGTTCCG<br>CGCAGATGCCAATGGAACAGATCAGGACGAGTTCAA<br>TAATGAGACACTGTACTTTGAAAGATCACGCATTTCGG<br>ACACTGCAAGACGAACGTGTGAAGCAAAAGACTGAG<br>ATGACAGGAGCTCGACGTATTGCTAATgtaagtgttataagtt<br>catg<br><i>in bold are silent mutations introduced to avoid repair template recognition by Cas9 or to maintain codon balance; bases in lowercase indicate intron regions</i>        |
| For screening of <i>sma-1</i> ΔABD#1 successful events_Fwd      | GGAAAGACGCTGAGCTAGTA                                                                                                                                                                                                                                                                                                                                                                                     |
| For screening of <i>sma-1</i> ΔABD#1 successful events_Rev      | CTCCTTGTACTTTGGTGGTTTC                                                                                                                                                                                                                                                                                                                                                                                   |
| crRNA #1 used to generate <i>sma-1</i> ΔABD#2 mutant            | CTCGTCTTGATCTGTTCCAT                                                                                                                                                                                                                                                                                                                                                                                     |
| crRNA #2 used to generate <i>sma-1</i> ΔABD#2 mutant            | TTAAATTTTTCAGGATGAGG                                                                                                                                                                                                                                                                                                                                                                                     |
| Repair template used to generate <i>sma-1</i> ΔABD#2 mutant     | aaagttttaaagatccgaaaaaaactgagaacgtttgaaatatttaacagttcaattagc<br>atcaagtcataatgatttttcagGTTTCGTGTTCCAACAAGTGGTGC<br>ACCACCAGTTAATCGG-intron3/4-<br>GATGAGGAAGAGCGTGGAGAGCGAAAACATGCCAA<br>AGATGCCTTGCTGTTGTGGTGTTCAGAGAAAAACAGC<br>TGGATATCCAAATGTTTCGCATCGAGAACTTCACTACA<br>AGTTGG<br><i>bases in lowercase indicate intron regions; intron3/4 as in sma-1 transcript R31.1a, Wormbase version WS279</i> |
| For screening of <i>sma-1</i> ΔABD#2 successful events_Fwd      | AACGGAAAGACGCTGAGCTAGT                                                                                                                                                                                                                                                                                                                                                                                   |

|                                                                |                                                                                                                                                                                                                                                                                            |
|----------------------------------------------------------------|--------------------------------------------------------------------------------------------------------------------------------------------------------------------------------------------------------------------------------------------------------------------------------------------|
| For screening of <i>sma-I</i> ΔABD#2 successful events_Rev     | GATCCGGACGGTGCGAATGG                                                                                                                                                                                                                                                                       |
| crRNA #1 used to generate <i>sma-I</i> ΔSH3 mutant             | ATTGACTGGTAGTAGCAGTG                                                                                                                                                                                                                                                                       |
| crRNA #2 used to generate <i>sma-I</i> ΔSH3 mutant             | TCTAGACTGACCATGACCTT                                                                                                                                                                                                                                                                       |
| Repair template used to generate <i>sma-I</i> ΔSH3 mutant      | gcagGAGTGACATCAGTCGACTCGAGGAGATGCAAAG<br>TCAGCTAGCAAACGAAGGTCATGGTCAGTCTAGAAA<br>AATCGAAGTTCGTCAACATAAGATCAA<br><i>bases in lowercase indicate intron regions</i>                                                                                                                          |
| For screening of <i>sma-I</i> ΔSH3 successful events_Fwd       | CAGTCGACTCGAGGAGATGC                                                                                                                                                                                                                                                                       |
| For screening of <i>sma-I</i> ΔSH3 successful events_Rev       | TGGTTTCAAATCACGCTCCA                                                                                                                                                                                                                                                                       |
| Single guide RNA #1 used to generate <i>sma-I</i> ΔPH mutant   | TGGGTGCTATTGACATGAA                                                                                                                                                                                                                                                                        |
| Single guide RNA #2 used to generate <i>sma-I</i> ΔPH mutant   | ACGACTTGAGCTGATTACT                                                                                                                                                                                                                                                                        |
| Repair template used to generate <i>sma-I</i> ΔPH mutant       | CGTTCAATACTCGTCGTACTCAATCAATCCGCAAAGG<br>AAGTCGCTGGGAAGATATGGGTCCATCCAATCAACT<br><b>GAAATCGTATGCGTACAACG</b> gtagttaattactatttaaattattaacc<br>agtttgcttcag<br><i>in bold are silent mutations introduced to avoid repair<br/>template recognition by Cas9 or to maintain codon balance</i> |
| For screening of <i>sma-I</i> ΔPH successful events_Fwd        | GCAAAGACTACCGCTGATTT                                                                                                                                                                                                                                                                       |
| For screening of <i>sma-I</i> ΔPH successful events_Rev        | GTTGATCTGGACTTTGGAAGAG                                                                                                                                                                                                                                                                     |
| Single guide RNA #1 used to generate <i>sma-I</i> Δ11SR mutant | CGTGACCTCGGTCGAGATGT                                                                                                                                                                                                                                                                       |
| Single guide RNA #2 used to generate <i>sma-I</i> Δ11SR mutant | TTACAAGATAAGGAAGCGAC                                                                                                                                                                                                                                                                       |
| Repair template used to generate <i>sma-I</i> Δ11SR mutant     | GTGACGTTGACGAGTTTGAGCAATGGATGGCAGACA<br>AAATGGCCAACATGGTAGCAATGGAACAGGAAGATC<br>TTTCGAGAGCTGATCTTGCTTCCGTGAA                                                                                                                                                                               |
| For screening of <i>sma-I</i> Δ11SR successful events_Fwd      | AGCAGGAAGCACTCAGAACC                                                                                                                                                                                                                                                                       |
| For screening of <i>sma-I</i> Δ11SR successful events_Rev      | GCCGAGTATCTGGGAACGAG                                                                                                                                                                                                                                                                       |

|                                                               |                                                                                                                                                                                                                                                                                                                           |
|---------------------------------------------------------------|---------------------------------------------------------------------------------------------------------------------------------------------------------------------------------------------------------------------------------------------------------------------------------------------------------------------------|
| Single guide RNA #1 used to generate <i>atn-1ΔABD</i> mutant  | AGGACTGTTAGATCCAGCA                                                                                                                                                                                                                                                                                                       |
| Single guide RNA #2 used to generate <i>atn-1ΔABD</i> mutant  | GGACTGTTAGATCCAGCAT                                                                                                                                                                                                                                                                                                       |
| Single guide RNA #3 used to generate <i>atn-1ΔABD</i> mutant  | ATGCTGGATCTAACAGTCC                                                                                                                                                                                                                                                                                                       |
| Repair template used to generate <i>atn-1ΔABD</i> mutant      | CATACCATCAGCCGGGCTACGACTACACTCAACAAG<br>AGGAAGAATGGGACCGTGAAGGATT <b>ACTGGATCCT</b><br>GCCTGGGAGGCATTTTCGTAACATGCGTGATCCTCCAC<br>CACCAGTTATTCGCCAACCACCACCACAGCGTGTTGT<br>TGTTGCTCCACCTCCAGAG<br><i>in bold are silent mutations introduced to avoid repair template recognition by Cas9 or to maintain codon balance</i> |
| For screening of <i>atn-1ΔABD</i> successful events_Fwd       | CCTTCTTCACACCGTTCATC                                                                                                                                                                                                                                                                                                      |
| For screening of <i>atn-1ΔABD</i> successful events_Rev       | GAGACAAGGACAATGGACATTTA                                                                                                                                                                                                                                                                                                   |
| Single guide RNA #1 used to generate <i>sma-1::spGFP</i>      | TCGGATCGTTATTCAAGCG                                                                                                                                                                                                                                                                                                       |
| Single guide RNA #2 used to generate <i>sma-1::spGFP</i>      | GGTATCTACTTTGAATGTT                                                                                                                                                                                                                                                                                                       |
| Single guide RNA #3 used to generate <i>sma-1::spGFP</i>      | TGAAGATCAGCGTGTTGGTG                                                                                                                                                                                                                                                                                                      |
| For screening of <i>sma-1::spGFP</i> successful events_Fwd    | GCGAATTCATTACTTGGGTAGA                                                                                                                                                                                                                                                                                                    |
| For screening of <i>sma-1::spGFP</i> successful events_Rev    | GTCTTCCAGCTTTGGTGATAG                                                                                                                                                                                                                                                                                                     |
| Single guide RNA used to generate <i>plst-1::mCherry</i>      | CCATTAATCATCGGAACAAT                                                                                                                                                                                                                                                                                                      |
| For screening of <i>plst-1::mCherry</i> successful events_Fwd | GGTGGCATGGATGAATTG                                                                                                                                                                                                                                                                                                        |
| For screening of <i>plst-1::mCherry</i> successful events_Rev | CCAAATTTAGGCTAGAACTCGAT                                                                                                                                                                                                                                                                                                   |

**Table S2. List of oligonucleotides used in this study. Related to Figures 1-4 and 7.**



| Parameter                          | Symbol               | Value Range (standard value)                                       |
|------------------------------------|----------------------|--------------------------------------------------------------------|
| Actin Rigidity                     | $\mu_{actin}$        | 0.075 pN $\mu\text{m}^2$ <sup>[S14]</sup>                          |
| Actin Segmentation Length          | $l_{actin}$          | 0.1 $\mu\text{m}$                                                  |
| Actin Fiber Length (initial)       | $L_{actin}$          | 1 $\mu\text{m}$ <sup>[S15]</sup>                                   |
| Growing Speed of Barbed End        | $v_{b+}$             | 0 - 0.8 $\mu\text{m/s}$ (0.08 $\mu\text{m/s}$ ) <sup>[S16]</sup>   |
| Shrinking Speed of Barbed End      | $v_{b-}$             | 0 - 0.56 $\mu\text{m/s}$ (0.056 $\mu\text{m/s}$ ) <sup>[S16]</sup> |
| Growing Speed of Pointed End       | $v_{p+}$             | 0 $\mu\text{m/s}$                                                  |
| Shrinking Speed of Pointed End     | $v_{p-}$             | 0 - 0.14, $\mu\text{m/s}$ (.014 $\mu\text{m/s}$ ) <sup>[S16]</sup> |
| Switch Rate to Depolymerization    | $r_c$                | 8 Hz                                                               |
| Switch Rate to Polymerization      | $r_r$                | 4 Hz                                                               |
| Backbone Length of Myosin          | $L_{motor}$          | 0.15 $\mu\text{m}$ <sup>[S17]</sup>                                |
| Number of Binding Heads of Myosin  | $n$                  | 8                                                                  |
| Binding Range of Motor Head        | $d_{bind}$           | 0.01 $\mu\text{m}$                                                 |
| Binding Rate of Motor Head         | $b_{motor}$          | 10 Hz <sup>[S18]</sup>                                             |
| Unbinding Rate of Motor Head       | $u_{motor}$          | 0.3 Hz <sup>[S18]</sup>                                            |
| Maximum Motor Speed                | $v_0$                | 0.1 $\mu\text{m/s}$ <sup>[S19]</sup>                               |
| Stall Force                        | $f_0$                | 4 pN <sup>[S20]</sup>                                              |
| Backbone Resting Length of Plastin | $l_{plastin}$        | 0.012 $\mu\text{m}$ <sup>[S21]</sup>                               |
| Spring Stiffness                   | $k$                  | 250 pN/ $\mu\text{m}$                                              |
| Binding Range of Plastin           | $d_{bind}$           | 0.01 $\mu\text{m}$                                                 |
| Binding Rate of Plastin            | $b_{plastin}$        | 10 Hz                                                              |
| Unbinding Rate of Plastin          | $u_{plastin}$        | 0.5 Hz                                                             |
| Maximum Allowed Angular Difference | $\Delta\theta_{max}$ | 10 degrees                                                         |
| Rescue Probability of Plastin      | $r_{plastin}$        | 0.1                                                                |

|                                          |                  |                                                                        |
|------------------------------------------|------------------|------------------------------------------------------------------------|
| $\beta$ H-Spectrin Rigidity              | $\mu_{spectrin}$ | $7.5 \cdot 10^{-5} \text{ pN } \mu\text{m}^2$ [S22]                    |
| $\beta$ H-Spectrin Segmentation Length   | $l_{spectrin}$   | $0.05 \text{ } \mu\text{m}$                                            |
| $\beta$ H-Spectrin Backbone Length       | $L_{spectrin}$   | $0.15\text{-}0.35 \text{ } \mu\text{m}$ ( $0.2 \text{ } \mu\text{m}$ ) |
| Binding Range of Binding Head            | $d_{bind}$       | $0.01 \text{ } \mu\text{m}$                                            |
| Binding Rate of Binding Head             | $b_{spectrin}$   | $10 \text{ Hz}$                                                        |
| Unbinding Rate of Binding Head           | $u_{spectrin}$   | $0.5 \text{ Hz}$                                                       |
| Rescue Probability of $\beta$ H-Spectrin | $r_{spectrin}$   | $0.1$                                                                  |
| Width (Non Periodic Boundary)            | $x_0$            | $10 \text{ } \mu\text{m}$                                              |
| Height (Periodic Boundary)               | $y_0$            | $1\text{-}16 \text{ } \mu\text{m}$ ( $4 \text{ } \mu\text{m}$ )        |
| Initial Component Horizontal Range       | $x_i$            | $3 \text{ } \mu\text{m}$                                               |
| Background Viscosity                     | $\nu$            | $1 \text{ pN s / } \mu\text{m}^2$ [S23]                                |
| Background Temperature                   | $kT$             | $0.0042 \text{ pN } \mu\text{m}$                                       |
| Fiber Count                              | $N_F$            | $94\text{-}1,500$ (375)                                                |
| Motor Count                              | $N_M$            | $260\text{-}4,168$ (1,042)                                             |
| Plastin Count                            | $N_P$            | $0\text{-}120,000$ (30,000)                                            |
| $\beta$ H-spectrin Count                 | $N_S$            | $0\text{-}5,600$ (1,400)                                               |

**Table S3. Cytosim parameters used in simulations (where parameters were varied, base values are shown in parentheses). Related to Figures 7 and S7.**

## Supplemental References

- S1. Moorthy, S., Chen, L., and Bennett, V. (2000). *Caenorhabditis elegans* beta-G spectrin is dispensable for establishment of epithelial polarity, but essential for muscular and neuronal function. *J. Cell Biol.* *149*, 915–930.
- S2. Chan, F.-Y., Silva, A.M., Saramago, J., Pereira-Sousa, J., Brighton, H.E., Pereira, M., Oegema, K., Gassmann, R., and Carvalho, A.X. (2019). The ARP2/3 complex prevents excessive formin activity during cytokinesis. *Mol. Biol. Cell* *30*, 96–107.
- S3. Kovacevic, I., and Cram, E.J. (2010). FLN-1/filamin is required for maintenance of actin and exit of fertilized oocytes from the spermatheca in *C. elegans*. *Dev. Biol.* *347*, 247–257.
- S4. Maddox, A.S., Habermann, B., Desai, A., and Oegema, K. (2005). Distinct roles for two *C. elegans* anillins in the gonad and early embryo. *Development* *132*, 2837–2848.
- S5. Moulder, G.L., Cremona, G.H., Duerr, J., Stirman, J.N., Fields, S.D., Martin, W., Qadota, H., Benian, G.M., Lu, H., and Barstead, R.J. (2010).  $\alpha$ -actinin is required for the proper assembly of Z-disk/focal-adhesion-like structures and for efficient locomotion in *Caenorhabditis elegans*. *J. Mol. Biol.* *403*, 516–528.
- S6. Ono, S. (2001). The *Caenorhabditis elegans* unc-78 gene encodes a homologue of actin-interacting protein 1 required for organized assembly of muscle actin filaments. *J. Cell Biol.* *152*, 1313–1319.
- S7. Maddox, A.S., Lewellyn, L., Desai, A., and Oegema, K. (2007). Anillin and the septins promote asymmetric ingression of the cytokinetic furrow. *Dev. Cell* *12*, 827–835.
- S8. Leite, J., Chan, F.-Y., Osório, D.S., Saramago, J., Sobral, A.F., Silva, A.M., Gassmann, R., and Carvalho, A.X. (2020). Equatorial Non-muscle Myosin II and Plastin Cooperate to Align and Compact F-actin Bundles in the Cytokinetic Ring. *Front Cell Dev Biol* *8*, 573393.
- S9. Ding, W.Y., Ong, H.T., Hara, Y., Wongsantichon, J., Toyama, Y., Robinson, R.C., Nédélec, F., and Zaidel-Bar, R. (2017). Plastin increases cortical connectivity to facilitate robust polarization and timely cytokinesis. *J. Cell Biol.* *216*, 1371–1386.
- S10. Osório, D.S., Chan, F.-Y., Saramago, J., Leite, J., Silva, A.M., Sobral, A.F., Gassmann, R., and Carvalho, A.X. (2019). Crosslinking activity of non-muscle myosin II is not sufficient for embryonic cytokinesis in *C. elegans*. *Development* *146*.
- S11. Lewellyn, L., Carvalho, A., Desai, A., Maddox, A.S., and Oegema, K. (2011). The chromosomal passenger complex and centralspindlin independently contribute to contractile ring assembly. *J. Cell Biol.* *193*, 155–169.
- S12. Carvalho, A., Desai, A., and Oegema, K. (2009). Structural memory in the contractile ring makes the duration of cytokinesis independent of cell size. *Cell* *137*, 926–937.
- S13. Jia, R., Li, D., Li, M., Chai, Y., Liu, Y., Xie, Z., Shao, W., Xie, C., Li, L., Huang, X., et al. (2019). Spectrin-based membrane skeleton supports ciliogenesis. *PLoS Biol.* *17*, e3000369.
- S14. Gittes, F., Mickey, B., Nettleton, J., and Howard, J. (1993). Flexural rigidity of microtubules and actin filaments measured from thermal fluctuations in shape. *J. Cell Biol.* *120*, 923–934.

- S15. Burlacu, S., Janmey, P.A., and Borejdo, J. (1992). Distribution of actin filament lengths measured by fluorescence microscopy. *American Journal of Physiology-Cell Physiology* 262, C569–C577.
- S16. Shekhar, S., and Carlier, M.-F. (2017). Enhanced depolymerization of actin filaments by ADF/Cofilin and monomer funneling by capping protein cooperate to accelerate barbed-end growth. *Curr. Biol.* 27, 1990–1998.e5.
- S17. Billington, N., Wang, A., Mao, J., Adelstein, R.S., and Sellers, J.R. (2013). Characterization of three full-length human nonmuscle myosin II paralogs. *J. Biol. Chem.* 288, 33398–33410.
- S18. Guo, B., and Guilford, W.H. (2006). Mechanics of actomyosin bonds in different nucleotide states are tuned to muscle contraction. *Proc. Natl. Acad. Sci. U. S. A.* 103, 9844–9849.
- S19. Barua, B., Nagy, A., Sellers, J.R., and Hitchcock-DeGregori, S.E. (2014). Regulation of nonmuscle myosin II by tropomyosin. *Biochemistry* 53, 4015–4024.
- S20. Walcott, S., Warshaw, D.M., and Debold, E.P. (2012). Mechanical coupling between myosin molecules causes differences between ensemble and single-molecule measurements. *Biophys. J.* 103, 501–510.
- S21. Matsudaira, P., Mandelkow, E., Renner, W., Hesterberg, L.K., and Weber, K. (1983). Role of fimbrin and villin in determining the interfilament distances of actin bundles. *Nature* 301, 209–214.
- S22. Stokke, B.T., Mikkelsen, A., and Elgsaeter, A. (1985). Human erythrocyte spectrin dimer intrinsic viscosity: temperature dependence and implications for the molecular basis of the erythrocyte membrane free energy. *Biochim. Biophys. Acta* 816, 102–110.
- S23. Daniels, B.R., Masi, B.C., and Wirtz, D. (2006). Probing single-cell micromechanics in vivo: the microrheology of *C. elegans* developing embryos. *Biophys. J.* 90, 4712–4719.
